# Supplementary material
Source: Springer Nature journal article supplement (https://www.springermedizin.de/resource/supplementary/12893_2011_229_MOESM3_ESM.pdf/9511882)

### Intervention OR

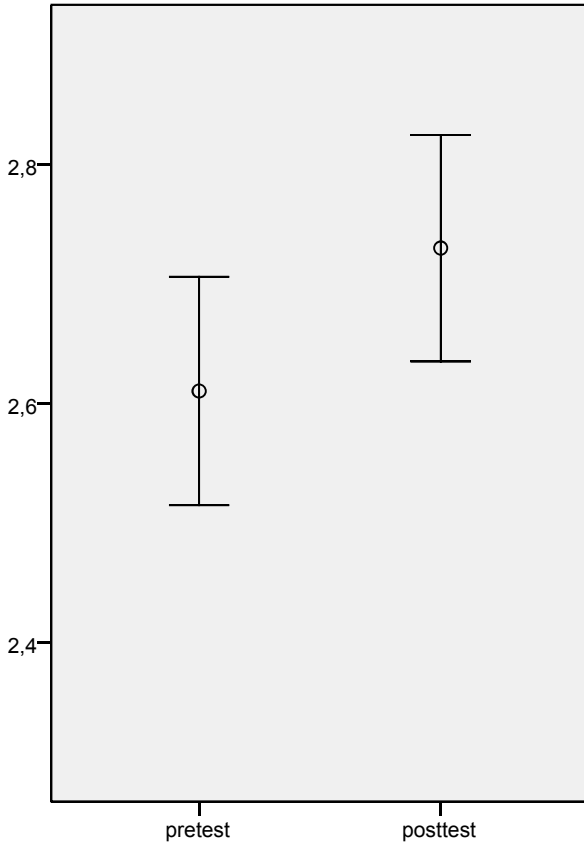

### Control OR

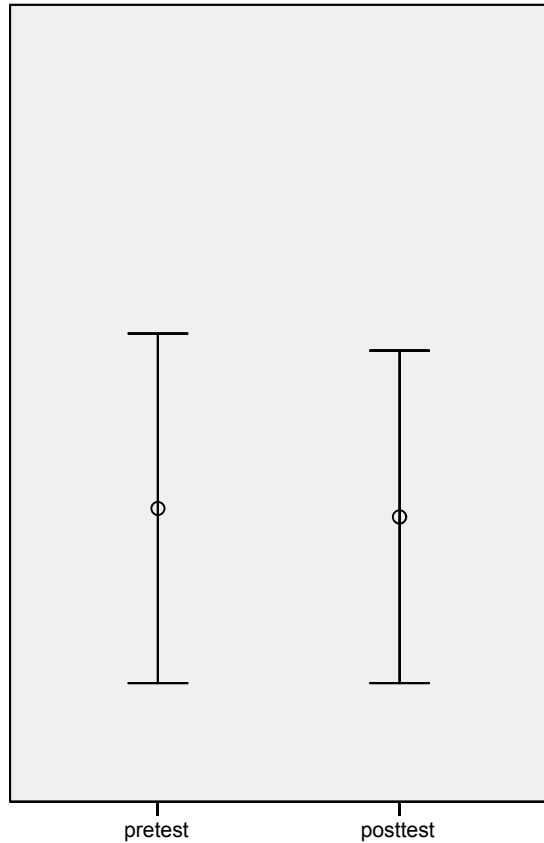

Supplement: MOESM3 [file 9511882]
